# Supplementary material for: Residual Effect of Compost and Biochar Amendment on Soil Chemical, Biological, and Physical Properties and Durum Wheat Response
Source: MDPI journal article supplement (doi:10.3390/agronomy14040749), 2024-04-05
Supplement: s1 [file s1]

## Descriptive statistics

Table S1, a, b, c.

### a. Descriptive statistics on soil chemical and biological properties

| Soil                                          | Mean     | Standard deviation | Skewness | Kurtosis  | K-S (p value)           |
|-----------------------------------------------|----------|--------------------|----------|-----------|-------------------------|
| pH                                            | 7.515    | 0.034322           | 0.525623 | 0.690241  | <b>0.1916 (0.02102)</b> |
| EC                                            | 0.33257  | 0.036311           | 0.272524 | -0.8731   | 0.09361 (0.63507)       |
| TOC                                           | 18.04433 | 1.51254            | 0.367517 | 0.427885  | 0.06847 (0.92266)       |
| Total N                                       | 1.5455   | 0.165922           | 1.722513 | 5.642806  | 0.14752 (0.13264)       |
| WEOC                                          | 63.88105 | 17.00094           | 0.722833 | 0.650943  | 0.09902 (0.90234)       |
| Soil respiration during the incubation period |          |                    |          |           |                         |
| 1 day                                         | 5.99148  | 2.609705           | 0.214076 | -0.82927  | 0.13113 (0.63347)       |
| 3 days                                        | 3.92342  | 1.121952           | 0.01364  | -1.11835  | 0.10193 (0.88327)       |
| 7 days                                        | 4.01891  | 1.359112           | -0.0419  | -0.78379  | 0.09733 (0.91258)       |
| 10 days                                       | 2.87704  | 1.084338           | 0.028722 | -0.2135   | 0.12428 (0.69703)       |
| 14 days                                       | 2.29957  | 0.806543           | 0.736607 | 0.551908  | 0.11249 (0.80203)       |
| 21 days                                       | 1.64649  | 0.496593           | 0.274553 | -0.927848 | 0.09819 (0.90743)       |
| 28 days                                       | 1.42337  | 0.472046           | 0.052348 | -0.227664 | 0.07166 (0.99488)       |

### b. Descriptive statistics on soil physical properties. The pressure head values are reported in absolute value.

|               | Mean    | Standard deviation | Skewness | Kurtosis  | K-S (p value)     |
|---------------|---------|--------------------|----------|-----------|-------------------|
| Bulk density  | 1.06222 | 0.040629           | -0.05383 | -0.10632  | 0.09825 (0.90705) |
| Pressure head |         |                    |          |           |                   |
| 2.5           | 0.60721 | 0.01817            | 0.70037  | -0.00111  | 0.13808 (0.56945) |
| 5             | 0.59160 | 0.01790            | 0.62169  | -0.24163  | 0.12918 (0.65165) |
| 10            | 0.58561 | 0.01614            | 0.33744  | -1.001758 | 0.1167 (0.76574)  |
| 20            | 0.54829 | 0.01949            | 0.97110  | 1.12105   | 0.17594 (0.27707) |
| 40            | 0.43242 | 0.03427            | 1.05214  | 1.61555   | 0.10405 (0.8684)  |
| 70            | 0.36206 | 0.02061            | 0.95598  | 0.27333   | 0.16771 (0.32993) |

### c. Descriptive statistics on grain yield and quality

|                 | Mean     | Standard deviation | Skewness | Kurtosis  | K-S (p value)     |
|-----------------|----------|--------------------|----------|-----------|-------------------|
| Grain yield     | 2.66933  | 0.620098           | 1.020081 | 1.453551  | 0.13297 (0.92195) |
| Protein content | 11.03333 | 0.309023           | -0.40788 | -0.795824 | 0.1219 (0.95912)  |
| Gluten content  | 6.64133  | 0.374983           | -0.79847 | -0.205361 | 0.15528 (0.81023) |
| Yellow Index    | 13.002   | 0.24066            | -0.68893 | 0.816467  | 0.13612 (0.90904) |
| Test weight     | 82.06867 | 0.600117           | 0.589663 | 0.62405   | 0.11577 (0.97388) |

Table S2. Encoding of dummy code for categorical variables. Each fertilizer treatment corresponds to a string of 1-0 code combination.

| <b>Fertilizer</b> | <b>Dummy code</b> |   |   |   |   |   |
|-------------------|-------------------|---|---|---|---|---|
| <i>CHAR10</i>     | 1                 | 0 | 0 | 0 | 0 | 0 |
| <i>CHAR30</i>     | 0                 | 1 | 0 | 0 | 0 | 0 |
| <i>COMP</i>       | 0                 | 0 | 1 | 0 | 0 | 0 |
| <i>MIN</i>        | 0                 | 0 | 0 | 1 | 0 | 0 |
| <i>TEST</i>       | 0                 | 0 | 0 | 0 | 0 | 1 |
